# Supplementary material for: Visualizing molecular interactions that determine assembly of a bullet-shaped vesicular stomatitis virus particle
Source: PubMed Central journal article supplement (PMC9378655; doi:10.1038/s41467-022-32223-1), 2022-08-15
Supplement: 41467_2022_32223_MOESM4_ESM.pdf [file 41467_2022_32223_MOESM4_ESM.pdf]

N\_protein

VSV\_Indiana 1 M S T V R R D N V V I L P K P P . . . A N E D P V E P P D Y F . R K S K E I P Y N T T K S G S D L R G Y V Y Q G L K S G N V S I  
 Morreton\_virus 1 M S T V R R D N V V I L P K P P . . . A N E D P V E P P D Y F . K K T N E V P Y N T S K T L N D L R G Y V Y Q G L K T G N V S I  
 Maraba\_virus 1 M S T V R R D D D I I T P K P P . . . A N E D P V E P P D Y F . K K S R D I P Y N T T K S L G D L R G Y V Y Q G L K S G N I S I  
 Cocal\_virus 1 M A T V R R D D S V I T P K P P . . . A S E D P V E P P D Y F . K K S R D I P Y N T T K S L A D L R G Y V Y Q G L K A G S I S I  
 Alagoas\_virus 1 M A T V R R D D S V I T P K P P . . . A S E D P V E P P D Y F . K K T S E I P F N T T K S L A E L R G F V Y Q G L K S G V V S I  
 Carajas\_virus 1 M N E I V K D D D V I G P K P P . . . A N E D P V E P P D Y F . K T S K Q I P Y N T D K T L A E L R A F V Y Q G L K A G N P S I  
 VSV\_New\_Jersey 1 M A T V R R D N S I T C P K P P . . . A N E D P V E P P D Y F . K N N T N I V Y S T K V A L N D L A Y V Y Q G I K S G N P S I  
 Chandipura\_virus 1 M S Q V C R L T G T V S V C L P . . . A N E D P V E P P A F F T P N A K K P T Y K K E T D L S L L R S H V Y M G L K D G S V T V  
 Piry\_virus 1 M S V S V R L T G S V L A A P . . . A S E D P V E P P E Y F A K N P G K I P F S T R L D L D K L R Q Y V Y M G L T T G E V N V  
 Isfahan\_virus 1 M I V V R R T G S V L A V P . . . A N E D P V E P P D Y F L Q N P G K I R C N K L D V A T L R Q Y V Y E G L K N G D V H V  
 Rabies\_virus 1 M E D C V V V N H Q V V S L P E I I S D Q Y E Y K P P I . . . K D L K K P C T L G A P D L N K A Y K S V L S C M S A J K L D P  
 Mokola\_virus 1 M E D C V V V N H Q V V S L P E V I S D Q Y E Y K P P I . . . L D G K K P G T L G A P D L N T A Y K S T L S C M S A J K L D P  
 consensus>50 M . . . v k . i . . . d . . . ! . . . l P . . . a n # d p v e % P a d y f . . . . . i . . . y i . . . . . l . . . l r . y ! y q g l k . g . . . i



N\_protein

VSV\_Indiana 67 I H N Y L A L N D F G L D K D W S S F G I N G A G D T G I F D S S R . . . A D V . L P D G V S D A S . . . S A D  
 Morreton\_virus 67 I H N Y L A L N D F G L D K D W I S F G V Q G K G D E G I F N S V R . . . T L E C I . I P D G V S D A S . . . S A D  
 Maraba\_virus 67 I H N Y L A L N E R G L D R D W I T F G I Q G K T G D S G I F D L T M . . . P D G V . L P D G V S D A T . . . S S D  
 Cocal\_virus 67 V H N Y L A L N D F G L D R D W I T F N I Q G A G D N G I F D S T V R . . . N L E G V . C P D G V S D A T . . . S A D  
 Alagoas\_virus 67 I H N Y L A L N D F G L D R D W I S F N I G R G A N G I F D S V R . . . G L E G V . C P D G V S D A S . . . S A D  
 Carajas\_virus 67 I H N Y L L A L N D K A L E R D W I T F S I T A G G E E T I F N S S R . . . P V I T . V P D G R T D P D . . . P N D  
 VSV\_New\_Jersey 67 L H N Y L A L N G F G L D R D W S F G R T G K E E N K I F D S K V E . . . E L K T A . L P D K S D P D . . . A E D  
 Chandipura\_virus 68 S Q N Y L M D L R E P D R K N W I S F V E G K I N E P G I F D L I N E . . . D V K K . E L D K G Q D T . . . P G D  
 Piry\_virus 68 C H N Y L R V L G N D E A R D N W S F R V T A A D T T R L F D M E K . . . E V A G L . V P D G K E N A N . . . Q T D  
 Isfahan\_virus 68 C H N Y L Q V R D R D A Q S D W I S F G V S A V G G I S V F D M E . . . D Y R G E . A P D R K C D G . . . I D D  
 Rabies\_virus 68 D D C Y L A L N C F G C P E D W I S Y G I V A R I G D K T P G S V E K R T D V E N W A L T G M E L T D P V P H  
 Mokola\_virus 68 D D C Y L A L N L E G C P E D W S Y G I V A K G E K N P S V D S Y R T N E G N W A Q S G T D V I D P M A H  
 consensus>50 . h ! n s Y L y . a \$ . d i . . . . . d . # W . s % g i . i . . . g d . v . i f d l . . v . . . . . g . . . . . p d g . d . r . . . t . . d d



N\_protein

VSV\_Indiana 132 K W L P L Y H G L R R G . . . T C M P E Y R R K M D G T N Q C K M I N E Q F E P G V P E G R D I D . . . . .  
 Morreton\_virus 132 A W L P L Y H G L R R G . . . T C M P E Y R R K M D G I N Q C K M I N E K F E P L V P E G R D I D . . . . .  
 Maraba\_virus 132 A W L P L Y H G L R R G . . . T C M P E Y R R K M D G I N Q C K M I N E Q F E P L V P E G R D V D . . . . .  
 Cocal\_virus 132 Q W L P L Y H G L R R G . . . T C M T D Y R R K M D G I A Q C K L I N E K F E P G T P E G R D F D . . . . .  
 Alagoas\_virus 132 N W L P L Y H G L R R G . . . T C M T D Y R R M D G I N Q C K M I D D K F E P L I P E G R D F D . . . . .  
 Carajas\_virus 132 K W L P I Y H G L R R G . . . T K L P E Y R R K M E G E M Q C K L M Y P D F V P L V P E G M D F D . . . . .  
 VSV\_New\_Jersey 132 K W L P I Y H G L R R G . . . S R V T D Y R R K L D G E N Q C R V A S T R F E S G V E D G L D F D . . . . .  
 Chandipura\_virus 133 L W L P T L H G L R R S . . . A T Q V E Y K K T M T N Y A Q C K L R T K D A E E L V D E T A E F N . . . . .  
 Piry\_virus 133 E W L P M Y H G L R R G . . . A T D E R Y G D Y D H C A Q C K L K S P S F E S G G N P A D N N A . . . . .  
 Isfahan\_virus 133 K W L P M L H G L R R S . . . A T Q E D Y R R S L Q K Y A Q C K L R S P Q A E E G V E D A A E F E . . . . .  
 Rabies\_virus 138 A S L V G L H S L R R S I S G Q S T G N Y K T N A D R . . . . . E G T F E T A P F K V E H H T L M T T H K M C A  
 Mokola\_virus 138 A S L V G L H C L R R S I V G Q S T A N Y K T N A D R . . . . . E G T F E T A P F K V E H H T L M T T H K M C A  
 consensus>50 . w L p . . . l g L y R v . r . . . . . e Y . k . l m d . l . . q c k . . . . . e . v . e . d . f d v . . . . .



N\_protein

VSV\_Indiana 185 . W G D S N T K I V A A V D M F H M K K H E C A S R Y G T V S R F P D C A L T F G H C K I T G S T E D V T W I N E  
 Morreton\_virus 185 . W G D S N T K I V A A V D M F H M K K H E K A S R Y G T V S R F P D C A L T F G H C K I T G S T E D V T W I N E  
 Maraba\_virus 185 . W G D S N T K I V A A V D M F H M K K H E K A S R Y G T V S R F P D C A L T F G H C K I T G S T E D V T W I N E  
 Cocal\_virus 185 . W G D G N T K I V A A V D M F H M K K H E K A S R Y G T V S R F P D C A L T F G H C K I T G S T E E V T W I N E  
 Alagoas\_virus 185 . W G D N N T K I V A A V D M F H M K K H E R A Y R Y G T V S R F P D C A L T F G H C K I T G S T E E V T W I N E  
 Carajas\_virus 185 . W G D S N T K I V A A V D M F H M K K H E R A S R Y G T V S R F P D C A L T F G H C K V S G M S T E E V T W I N E  
 VSV\_New\_Jersey 185 . W E D P N T K I V A A V D M F H M K K H E R P R Y G T V S R F P D C A L T F G H L S K V S G L S I E D V T W I N E  
 Chandipura\_virus 186 . W A D S N T K I V A A V D M F H H K K E D H A P R F G T V S R F P D C A L T L S H L Q K V T G L P I E E V F W I N S  
 Piry\_virus 186 . W I D S N T K I V A A V D M F H H K K H E V R F G T V S R F P D C A L T M A H V K V T G M P V S E V M W I N P  
 Isfahan\_virus 186 . W S D S N T K I V A A V D M F H K K H E A D G R W G T V S R F P D C A L T L S H V Q K V T G L S I K E V F W I N S  
 Rabies\_virus 196 N W S I P N P R P L A G T Y D M F S R . . . E H L Y A R V G T V V T A Y D C N L V S F T G F I K O I N L T A R E I Y P H N  
 Mokola\_virus 196 N W S I P N P R P L A G T Y D M F A R . . . E H L Y A R V G T V V T A Y D C N L V S F T G F I K O I N L S P E D L Y P H N  
 consensus>50 . W . n d . N % . k . v a a v D M % F h . f k k h e . a . . R y G T ! v s r % k D C a a L . t f . h . . K i . g \$ s . e # v . t w i l n . e
