# Supplementary material for: Visualizing molecular interactions that determine assembly of a bullet-shaped vesicular stomatitis virus particle
Source: Nat Commun. 2022 Aug 15;13:4802. doi: 10.1038/s41467-022-32223-1 (PMC9378655; doi:10.1038/s41467-022-32223-1)
Supplement: Supplementary file 5 — Supplementary Data 2 [file 41467_2022_32223_MOESM5_ESM.pdf]

● ●   ● ●   ●   ● ● ● ● ● ●   ●
