# Supplementary material for: Visualizing molecular interactions that determine assembly of a bullet-shaped vesicular stomatitis virus particle
Source: Nat Commun. 2022 Aug 15;13:4802. doi: 10.1038/s41467-022-32223-1 (PMC9378655; doi:10.1038/s41467-022-32223-1)
Supplement: Supplementary file 6 — Supplementary Data 3 [file 41467_2022_32223_MOESM6_ESM.pdf]

*M2\_protein*

[illegible]

*M2 protein*

[illegible]

*M2 protein*

[illegible]

M2 protein

|                  |     |    |   |    |                               |       |      |      |     |     |
|------------------|-----|----|---|----|-------------------------------|-------|------|------|-----|-----|
| VSV_Indiana      | 201 | FR | K | LM | GL                            | VEKK  | ASGA | WVL  | DSI | HFK |
| Morreton_virus   | 201 | FP | K | LL | GL                            | VEKK  | ATGA | WILD | SI  | NFK |
| Maraba_virus     | 201 | FR | K | LL | GL                            | ELEKK | ATGN | WVL  | DSI | HFK |
| Cocal_virus      | 201 | MK | K | LL | GL                            | ELERK | ATGS | WVL  | DSI | NFK |
| Alagoas_virus    | 201 | LR | N | LM | GL                            | VERK  | ATGS | WVL  | DSI | HFK |
| Carajas_virus    | 201 | FL | H | KR | GL                            | VLSKK | PGGG | WILD | Q   | VCA |
| VSV_New_Jersey   | 201 | IQ | E | LK | GL                            | LSKK  | ATGT | WVL  | DL  | PFK |
| Chandipura_virus | 204 | MI | G | AI | GL                            | SIKKQ | KDNT | WLI  | S   | H.. |
| Piry_virus       | 204 | ML | A | TI | GL                            | VKKKS | SDNN | YII  | S   | Y.. |
| Isfahan_virus    | 201 | MT | T | QM | GL                            | ELEK  | NDNT | WLI  | S   | Y.. |
| consensus>50     |     |    |   |    | ..e.a..fGLi..kk..g.wvld..s... |       |      |      |     |     |
